# Supplementary material for: Flexible Artificial Optoelectronic Synapse based on Lead‐Free Metal Halide Nanocrystals for Neuromorphic Computing and Color Recognition
Source: PubMed Central journal article supplement (PMC9353487; doi:10.1002/advs.202202123), 2022-06-05
Supplement: ADVS-9-2202123-s001.pdf [file ADVS-9-2202123-s001.pdf]

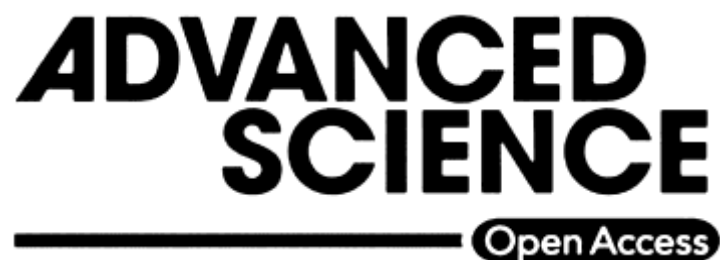

## Supporting Information

for *Adv. Sci.*, DOI: 10.1002/advs.202202123

Flexible Artificial Optoelectronic Synapse based on  
Lead-Free Metal Halide Nanocrystals for Neuromorphic  
Computing and Color Recognition

*Ying Li, Jiahui Wang, Qing Yang, and Guozhen Shen\**

## Supporting Information

### **Flexible Artificial Optoelectronic Synapse Based on Lead-Free Metal Halide Nanocrystals for Neuromorphic Computing and Color Recognition**

*Ying Li, Jiahui Wang, Qing Yang, Guozhen Shen\**

Dr. Ying Li, Prof. Guozhen Shen  
State Key Laboratory for Superlattices and Microstructures Institute of Semiconductors  
Beijing 100083, China

Prof. Guozhen Shen  
School of Integrated Circuits and Electronics, Beijing Institute of Technology, Beijing 100081,  
China.  
E-mail: gzshen@bit.edu.cn

Dr. Jiahui Wang, Prof. Qing Yang  
Laboratory of Nanomaterials for Energy Conversion, University of Science and Technology  
of China, Hefei 230026, P. R. China

Keywords: lead-free,  $\text{Cs}_3\text{Bi}_2\text{I}_9$ , flexible artificial synapse, neuromorphic computing, color recognition

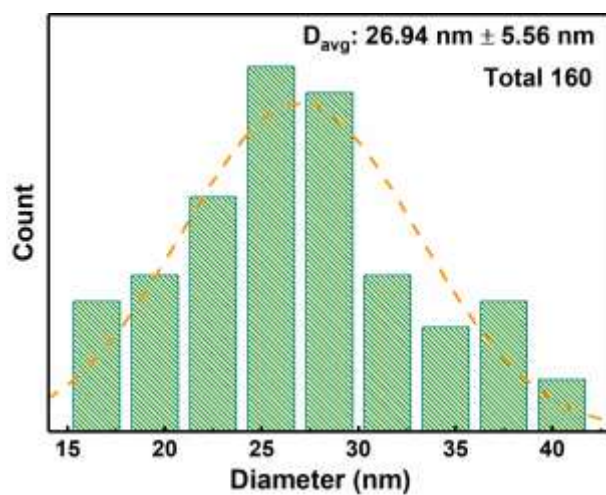

**Figure S1.** Statistical results of the diameter of Cs<sub>3</sub>Bi<sub>2</sub>I<sub>9</sub> NCs.

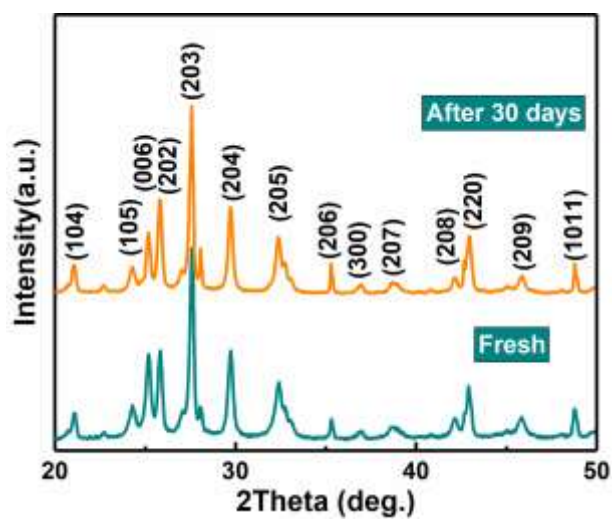

**Figure S2.** Comparison of the XRD patterns of the Cs<sub>3</sub>Bi<sub>2</sub>I<sub>9</sub> nanocrystals before and after storage for 30 days in air ambient.

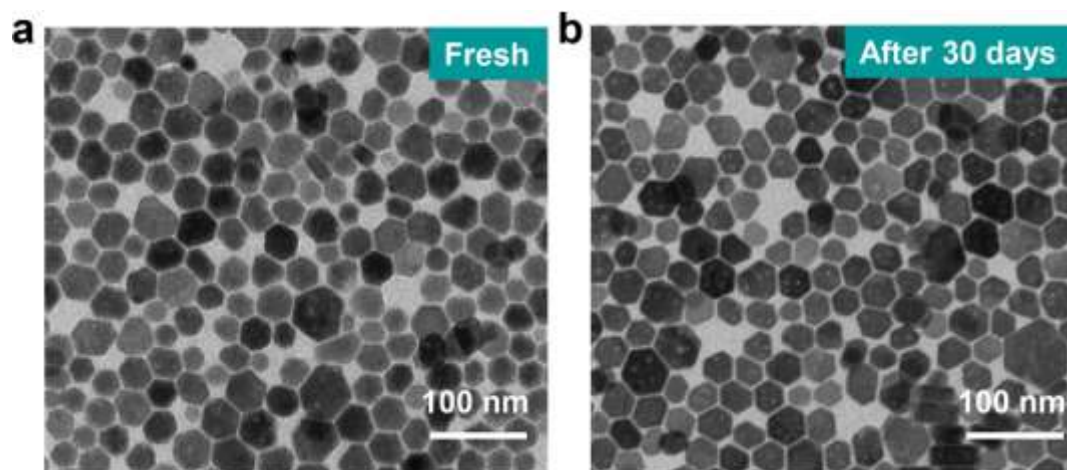

**Figure S3.** TEM images of a) fresh and b) stored in ambient conditions after 30 days.

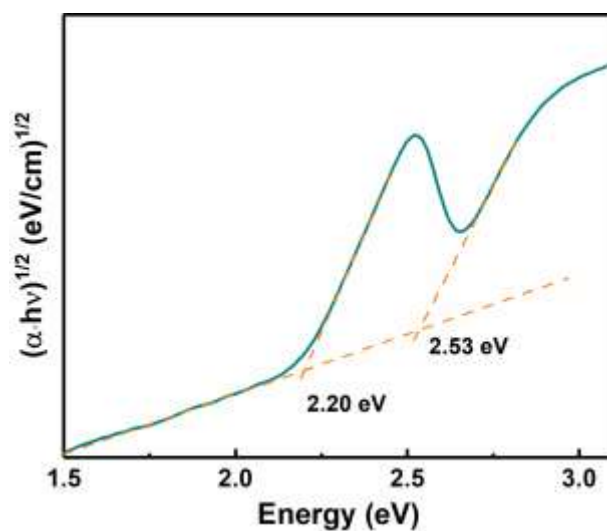

**Figure S4** Calculation of the optical bandgap of  $\text{Cs}_3\text{Bi}_2\text{I}_9$  nanocrystals using the Tauc method.

The bandgap of  $\text{Cs}_3\text{Bi}_2\text{I}_9$  nanocrystals (indirect bandgap) was estimated using Tauc equation  $(\alpha \cdot h\nu)^{1/2} = A(h\nu - E_g)$ . And the value of indirect optical and electronic bandgaps for the as-grown  $\text{Cs}_3\text{Bi}_2\text{I}_9$  nanocrystals is estimated to be around 2.20 eV and 2.53 eV.

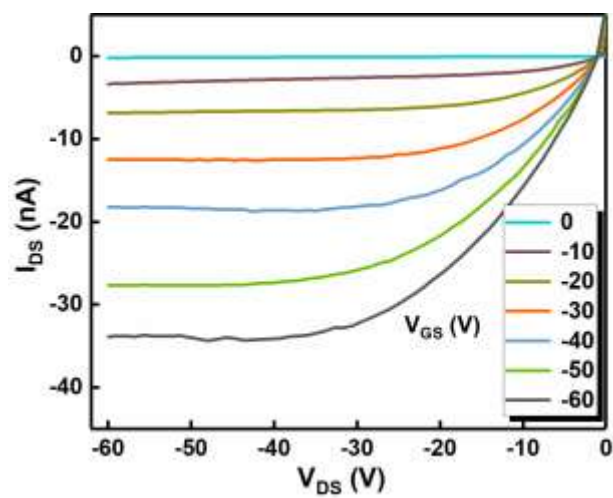

**Figure S5.** Output characteristics of the device in the dark condition with different  $V_{GS}$  values.

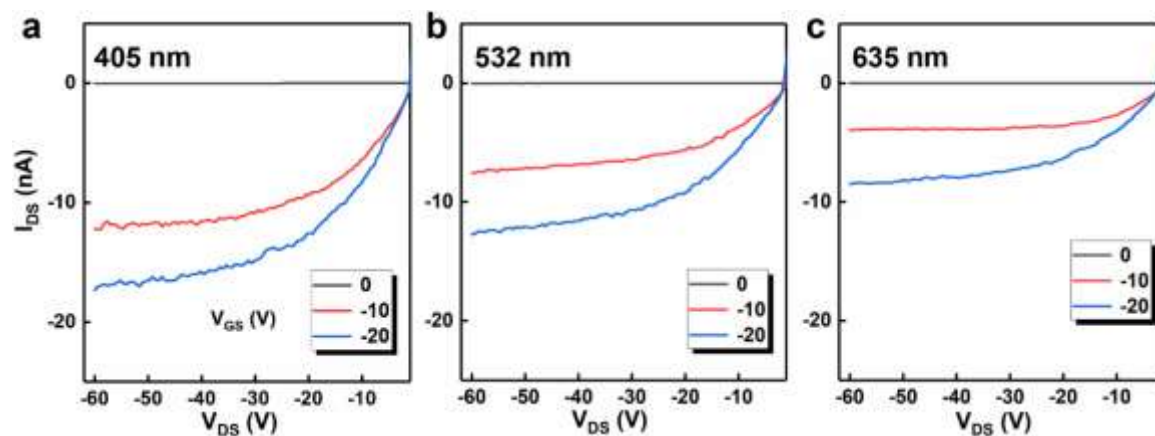

**Figure S6.** Output characteristics of Cs<sub>3</sub>Bi<sub>2</sub>I<sub>9</sub> QDs/PMMA/DPPDIT FETs under a) 405 nm, b) 532 nm, c) 635 nm light condition ( $0.1 \text{ mW cm}^{-2}$ ).



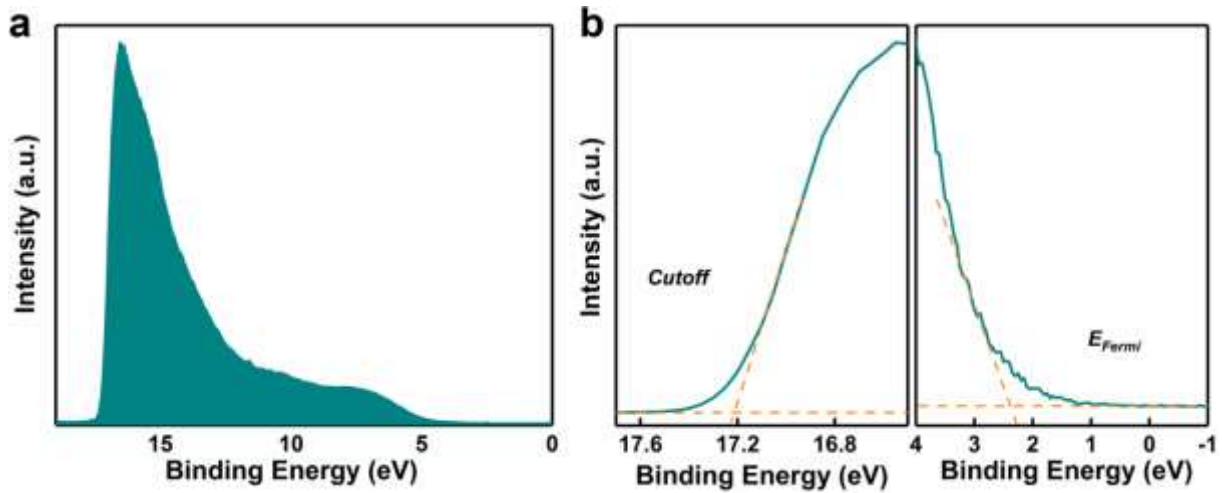

**Figure S7** UPS data of the  $\text{Cs}_3\text{Bi}_2\text{I}_9$  nanocrystals.

UPS measurements were performed to determine the valence band maximum of  $\text{Cs}_3\text{Bi}_2\text{I}_9$  nanocrystals, and the value can be obtained by the following formulas

$$E_{VBM} = h\nu - E_{\text{cutoff}} + E_{\text{Fermi}} \quad (1)$$

$$E_{CBM} = E_{VBM} + E_g \quad (2)$$

in which  $h\nu$  is the ultraviolet radiation energy (21.22 eV),  $E_{\text{cutoff}}$  is the binding energy of the secondary cutoffs in the spectra, and  $E_{\text{Fermi}}$  is the difference between the valence band maximum ( $E_{VBM}$ ) and the Fermi level. Combined with the bandgap energy of 2.20 eV, we derived the  $E_{VBM}$  and conduction band minimum ( $E_{CBM}$ ) value as 6.39 eV and 4.19 eV, respectively.

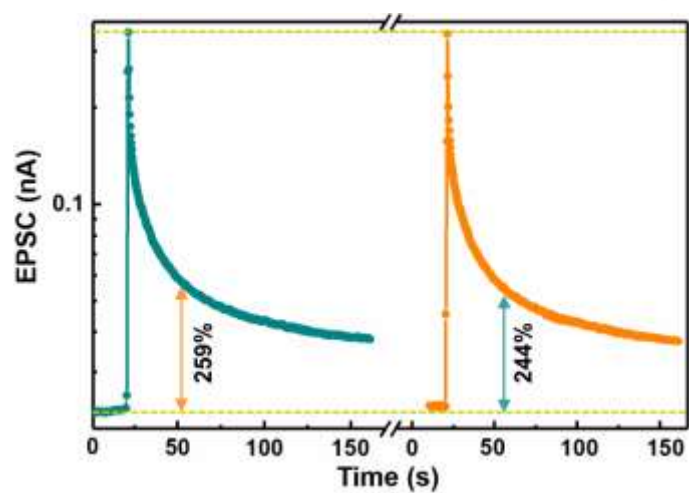

**Figure S8.** Stability of the unencapsulated device after 1 month storage in the open air (405 nm,  $0.1 \text{ mW cm}^{-2}$ , duration of 1 s).

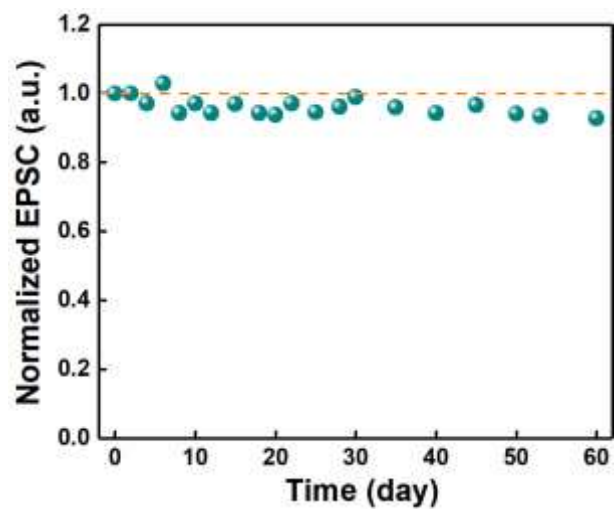

**Figure S9.** Stability of the unencapsulated device after 60 days storage in the open air (405 nm,  $0.1 \text{ mW cm}^{-2}$ , duration of 1 s).

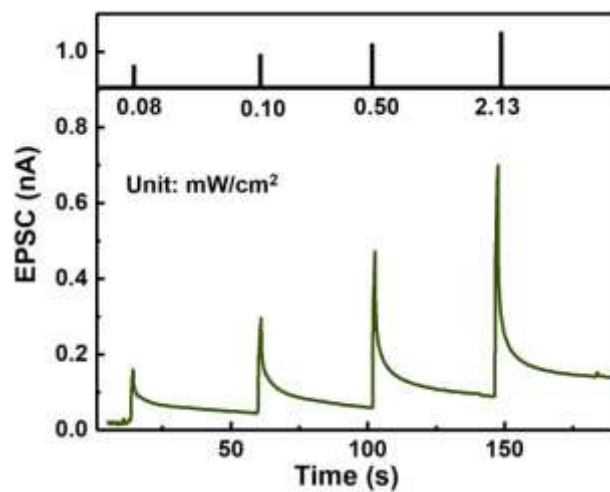

**Figure S10.** EPSC behavior triggered by light pulses of different intensities (pulse width is 1 s).

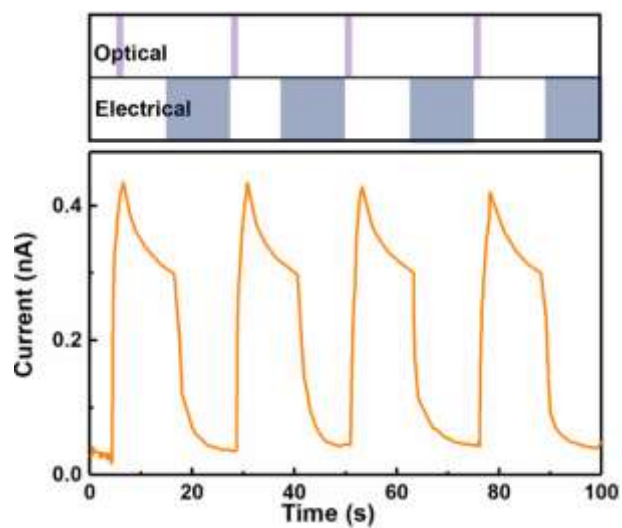

**Figure S11.** Switching characteristics of the device under a 405 nm light ( $0.10 \text{ mW/cm}^2$ , pulse width 3 s) and a reset voltage pulse ( $V_{GS} = -20 \text{ V}$ , pulse width 10 s).

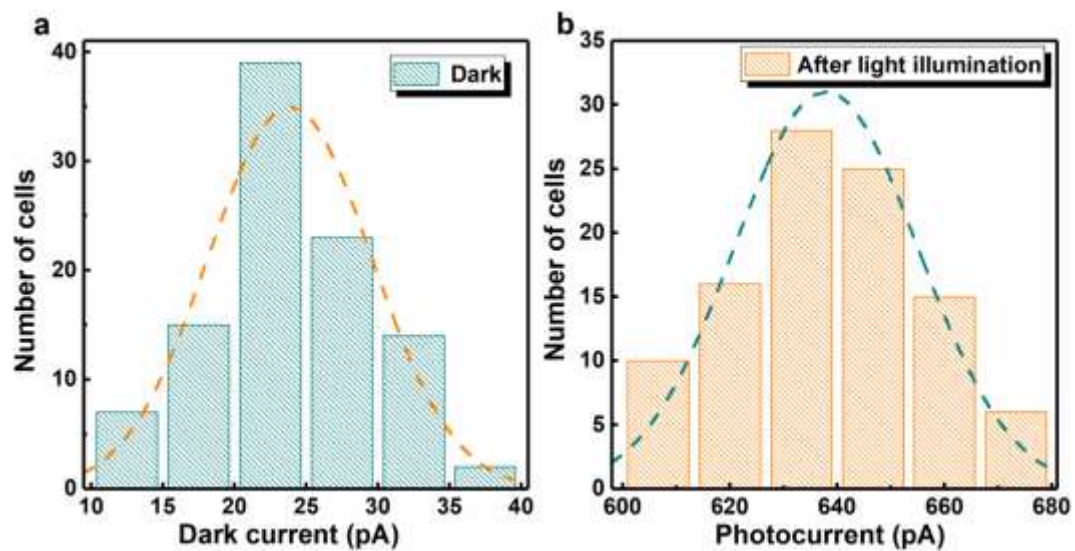

**Figure S12.** The statistical dark current and photocurrent after light illumination of 40 s ( $V_{GS}=0$  V,  $V_{DS}=-10$  V,  $0.1$  mW cm $^{-2}$ ). The sample size is 100.

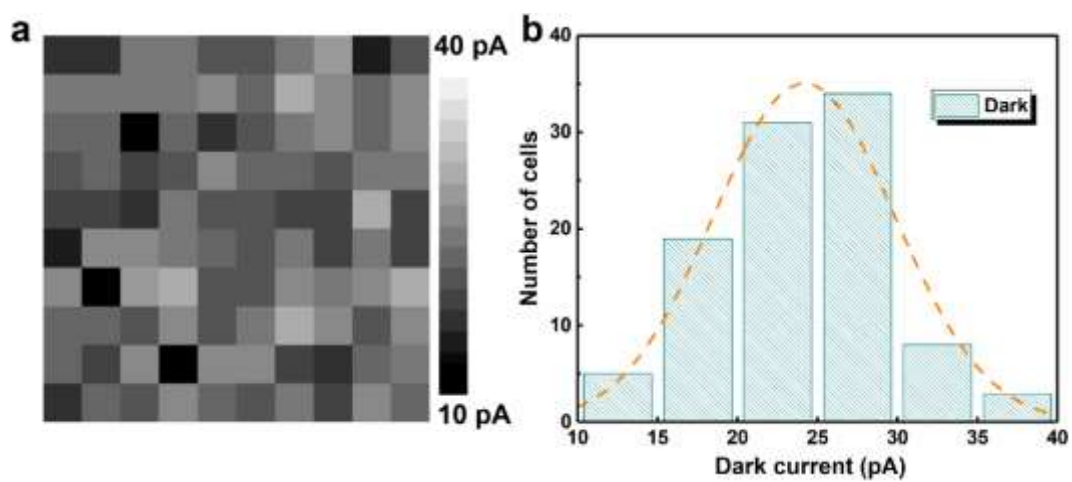

**Figure S13.** a) The dark current mapping of the device after electrical erasing ( $V_{GS} = -20$  V, pulse width 10 s). b) The corresponding statistical dark current, and the sample size is 100.

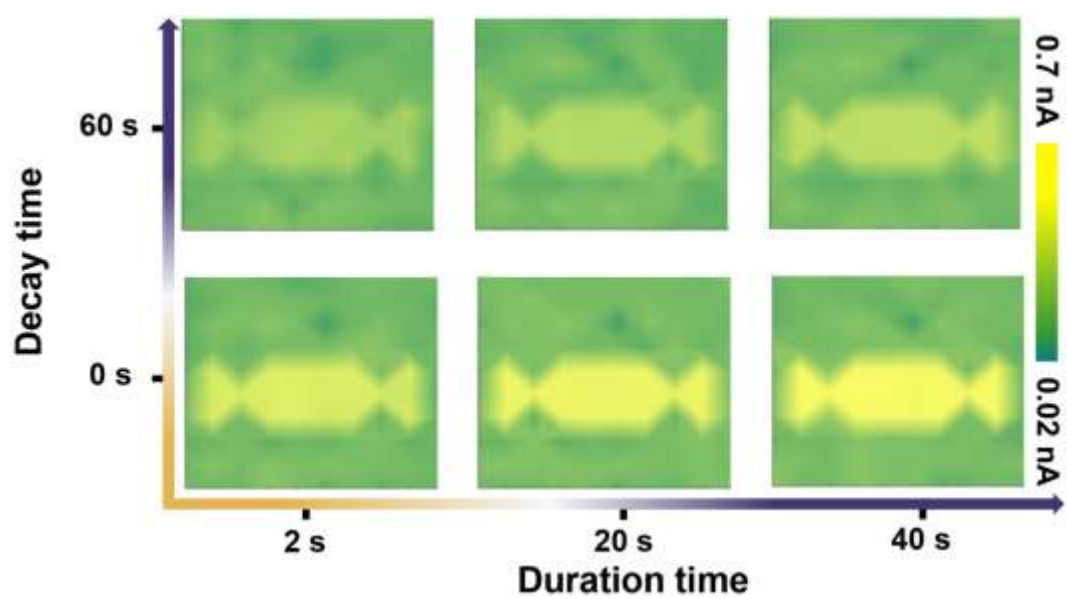

**Figure S14.** The current response image mapping of the  $10 \times 10$  array with decay time of 0 s and 60 s.



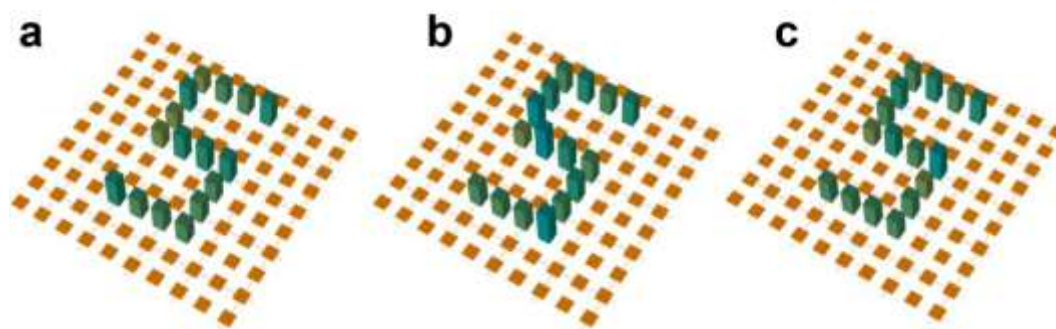

**Figure S15.** The imaging results of letter “5” in a) flat state and after 1000 b) bending and c) folding cycles (405 nm, 0.1 mW/cm<sup>2</sup>, duration of 2 s).

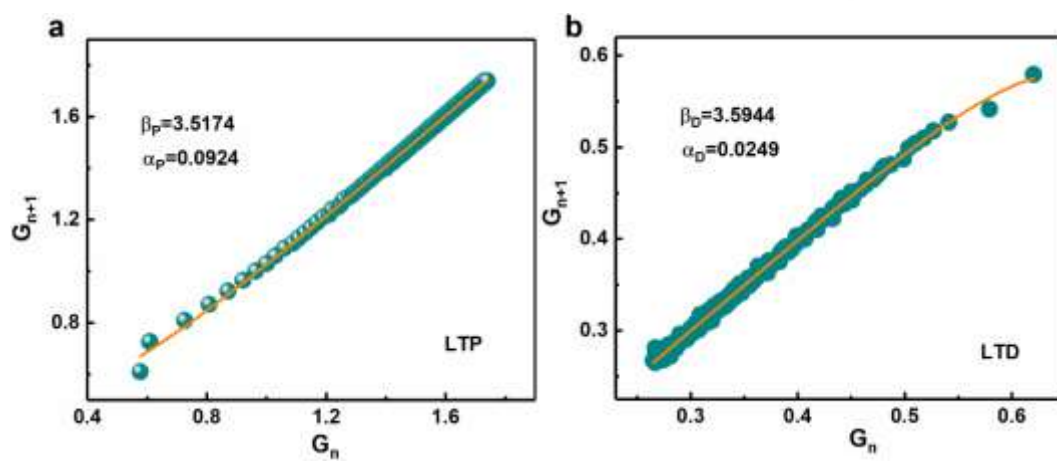

**Figure S16.** Fitting curves obtained from the experimental a) LTP data, and b) LTD data.

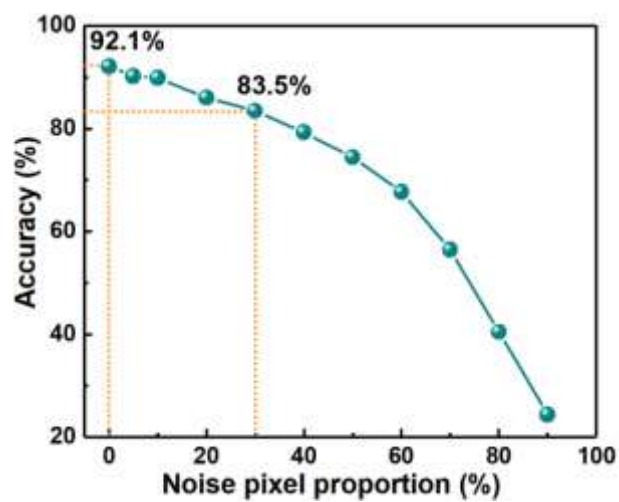

**Figure S17.** Recognition accuracy of the network as a function of noise pixel proportion.

**Table S1 Extracted fitting parameters for the device at flat, bending, and****folding state**

| <b>State</b>   | <b><math>\alpha_P</math></b> | <b><math>\beta_P</math></b> | <b><math>\alpha_D</math></b> | <b><math>\beta_D</math></b> |
|----------------|------------------------------|-----------------------------|------------------------------|-----------------------------|
| <b>Flat</b>    | 0.0924                       | 3.5174                      | 0.0249                       | 3.5944                      |
| <b>Bending</b> | 0.0733                       | 3.6178                      | 0.0457                       | 3.3416                      |
| <b>Folding</b> | 0.0747                       | 3.6517                      | 0.0301                       | 3.6241                      |
